# Supplementary material for: Microbial communities on flower surfaces act as signatures of pollinator visitation
Source: PubMed Central journal article supplement (PMC4346974; doi:10.1038/srep08695), 2015-03-03
Supplement: srep08695-s1.pdf [file srep08695-s1.pdf]

Supporting Information  
**Microbial communities on flower surfaces act as signatures of pollinator visitation**

Masayuki Ushio, Eri Yamasaki, Hiroyuki Takasu, Atsushi J. Nagano, Shohei Fujinaga, Mie N. Honjo, Mito Ikemoto, Shoko Sakai, Hiroshi Kudoh

**Contents:**

**Supplementary Methods.**

Sequence data accessibility, sequence data handling procedure, and the unique OTU identification algorithm.

**Table S1**

Sequence and OTU counts for the lab experiment.

**Table S2**

Unique microbial OTUs identified in the lab experiment.

**Table S3**

Sequence and OTU counts for the field research.

**Figure S1**

An example of collected insects and an image of microbes on an insect body surface.

**Figure S2**

Taxonomy assigned to the 20 most dominant OTUs using Claident.

**Figure S3**

NMDS plots for 100-bp, 150-bp, and 200-bp trimming datasets for the lab experiment.

**Figure S4**

NMDS plots for 100-bp, 150-bp, and 200-bp trimming datasets for the field study.

## Supplementary methods

### *Sequence data accessibility*

The sequence data is deposited in Sequence Read Archive (DRA) of DNA Data Bank of Japan (DDBJ). The accession numbers are PRJDB2873 for BioProject, DRA002257 for the submission data, DRX017025–DRX017182 for the experiment data, DRR18836–DRR18993 for the run data, and SAMD00017148–SAMD00017268 for BioSample data.

### *Sequence handling procedure*

UPARSE, which allows accurate OTU identification<sup>1</sup>, was used for quality filtering and OTU clustering of the sequence data. We generally followed the data handling procedure described by Edgar<sup>1</sup> and the website ([http://drive5.com/usearch/manual/uparse\\_cmds.html](http://drive5.com/usearch/manual/uparse_cmds.html), Edgar, R., UPARSE Commands, Date of access:19/1/2015). The raw FASTQ file was processed by `fastq_strip_barcode_relabel2.py` script. Then, quality filtering, dereplication, abundance sorting, singleton removal, OTU clustering, and chimera filtering were conducted. Codes for these analyses are described as follows:

#### *1. Stripping*

```
python fastq_strip_barcode_relabel2.py data.fq GGACTACVSGGGTATCTAAT
tags.fasta Ex > 1_read2.fq
```

#### *2. Quality filtering*

```
usearch -fastq_filter 1_read2.fq -fastaout 2_filtered.fa -fastq_truncqual 15
-fastq_truncflen 150 -fastq_qmax 60
```

(Note that the value of the option “-fastq\_truncflen” was either of 100, 150, or 200)

#### *3. Dereplication*

```
usearch -derep_fulllength 2_filtered.fa -output 3_derep.fa -sizeout
```

#### *4. Abundance sorting*

```
usearch -sortbysize 3_derep.fa -output 4_sorted.fa -minsize 2
```

#### *5. OTU clustering*

```
usearch -cluster_otus 4_sorted.fa -otus 5_otus1.fa
```

#### *6. Chimera checking*

```
usearch -uchime_ref 5_otus1.fa -db gold.fa -strand plus -nonchimeras 6_otus2.fa
```

#### *7. OTU Labeling*

```
python fasta_number.py 6_otus2.fa OTU_ > 7_otus.fa
```

#### *8. OTU table creation*

```
usearch -usearch_global 2_filtered.fa -db 7_otus.fa -strand plus -id 0.97 -uc
8_map.uc
```

```
python uc2otutab.py 8_map.uc > 9_otu_table.txt
```

Taxa were assigned by `clidentseq` and `classignseq` commands implemented in Claident<sup>2</sup> (<http://www.claident.org/>, Tanabe, A.S., Claident, Date of access:19/1/2015) described as follows:

#### *9. Retrieving neighborhood sequences*

```
clidentseq blast -strand plus end --blastdb=all_genus --numthreads=24 7_otus.fa
otus_claident
```

(7\_otus.fa is fasta file generated by the UPARSE analysis)

#### *10. Assigning taxa*

```
classigntax --taxdb=all_genus otus_claident tax_claident
```

For the downstream statistical analysis, the free statistical environment R<sup>3</sup> was used. The

OTU table generated by the UPARSE and Claident processing was exported using the “phyloseq” package<sup>4</sup>. Nonmetric dimensional scaling (NMDS) using the Bray–Curtis dissimilarity index was performed to visualize the microbial community composition on flowers, on insects, and in other samples. NMDS using the Bray–Curtis dissimilarity index was chosen because our preliminary analyses suggested that these methods were more suitable for visualizing our dataset compared than principle coordinate analysis using weighted/unweighted UniFrac distance.

#### *Unique OTU identification*

Unique microbial OTUs were selected under two criteria: 1) the mean value of the sequence counts of a unique microbial OTU detected from a treatment was five-fold larger than the maximum mean value in other treatments, and 2) the coefficient of variation of the sequence counts of a unique microbial OTU was less than 300%.

First, we calculated mean values and coefficients of variation (i.e., standard deviation divided by mean value) of OTU counts of an insect species (i.e., carpenter bees, bumblebees, and honeybees). We compared the maximum mean value among the three insect species with the second highest mean value. If the maximum mean value was five times greater than the second highest value, the OTU was a candidate unique OTU for the insect species. The candidate OTU was further checked by the second criterion. If the coefficient of variation of the OTU on the candidate insect species was smaller than 300%, we considered the OTU to be unique to the insect species. Under these criteria, a total of 20 OTUs were identified as unique. Among 207 OTUs, 13 were unique to carpenter bees, four to bumblebees, and three to honeybees (Table S2).

## References cited in supplementary methods

1. Edgar, R. C. UPARSE: highly accurate OTU sequences from microbial amplicon reads. *Nat. Methods* **10**, 996–998 (2013).
2. Tanabe, A. S. & Toju, H. Two new computational methods for universal DNA barcoding: a benchmark using barcode sequences of bacteria, archaea, animals, fungi, and land plants. *PLoS One* **8**, e76910 (2013).
3. R Core Team. R: A Language and Environment for Statistical Computing. (2014).
4. McMurdie, P. J. & Holmes, S. Phyloseq: An R Package for Reproducible Interactive Analysis and Graphics of Microbiome Census Data. *PLoS One* **8**, e61217 (2013).

Table S1. Sample description for the laboratory experiment

| Sample ID                                         | ScientificName                             | Experiment category             | 200 bp trimming |           | 150 bp trimming |              | 100 bp trimming |              |               |            |               |
|---------------------------------------------------|--------------------------------------------|---------------------------------|-----------------|-----------|-----------------|--------------|-----------------|--------------|---------------|------------|---------------|
|                                                   |                                            |                                 | Sequence        | OTU       | (≥ 100 seqs)    | Sequence     | OTU             | (≥ 200 seqs) | Sequence      | OTU        | (≥ 1000 seqs) |
| <b>Control flowers (never touched by insects)</b> |                                            |                                 |                 |           |                 |              |                 |              |               |            |               |
| No.170                                            | <i>Mallotus japonicus</i>                  | Control flower                  | 308             | 16        | Y               | 646          | 30              | Y            | 2911          | 50         | Y             |
| No.171                                            | <i>Mallotus japonicus</i>                  | Control flower                  | 321             | 21        | Y               | 793          | 52              | Y            | 2898          | 82         | Y             |
| No.172                                            | <i>Mallotus japonicus</i>                  | Control flower                  | 106             | 15        | Y               | 353          | 31              | Y            | 2295          | 46         | Y             |
| No.173                                            | <i>Mallotus japonicus</i>                  | Control flower                  | 12              | 5         | N               | 46           | 13              | N            | 941           | 26         | N             |
| No.180                                            | <i>Mallotus japonicus</i>                  | Control flower                  | 227             | 8         | Y               | 583          | 20              | Y            | 3573          | 43         | Y             |
| No.181                                            | <i>Mallotus japonicus</i>                  | Control flower                  | 136             | 20        | Y               | 353          | 36              | Y            | 4050          | 72         | Y             |
| No.182                                            | <i>Mallotus japonicus</i>                  | Control flower                  | 178             | 17        | Y               | 477          | 34              | Y            | 4923          | 54         | Y             |
| <b>Carpenter bees</b>                             |                                            |                                 |                 |           |                 |              |                 |              |               |            |               |
| No.157                                            | <i>Xylocopa appendiculata circumvolans</i> | <i>Xylocopa</i>                 | 1204            | 11        | Y               | 2500         | 15              | Y            | 5075          | 22         | Y             |
| No.159                                            | <i>Xylocopa appendiculata circumvolans</i> | <i>Xylocopa</i>                 | 1656            | 15        | Y               | 3772         | 30              | Y            | 6528          | 47         | Y             |
| No.161                                            | <i>Xylocopa appendiculata circumvolans</i> | <i>Xylocopa</i>                 | 1228            | 10        | Y               | 2660         | 21              | Y            | 4234          | 33         | Y             |
| No.156                                            | <i>Mallotus japonicus</i>                  | <i>Xylocopa</i> -touched flower | 2616            | 15        | Y               | 5507         | 27              | Y            | 9661          | 48         | Y             |
| No.158                                            | <i>Mallotus japonicus</i>                  | <i>Xylocopa</i> -touched flower | 926             | 20        | Y               | 2203         | 43              | Y            | 4070          | 79         | Y             |
| No.160                                            | <i>Mallotus japonicus</i>                  | <i>Xylocopa</i> -touched flower | 345             | 22        | Y               | 724          | 41              | Y            | 1575          | 67         | Y             |
| <b>Bumblebees</b>                                 |                                            |                                 |                 |           |                 |              |                 |              |               |            |               |
| No.177                                            | <i>Bombus ardens ardens</i>                | <i>Bombus</i>                   | 135             | 19        | Y               | 326          | 34              | Y            | 2869          | 59         | Y             |
| No.179                                            | <i>Bombus ardens ardens</i>                | <i>Bombus</i>                   | 40              | 19        | N               | 156          | 61              | N            | 1020          | 97         | Y             |
| No.188                                            | <i>Bombus ardens ardens</i>                | <i>Bombus</i>                   | 298             | 39        | Y               | 786          | 73              | Y            | 2032          | 114        | Y             |
| No.190                                            | <i>Bombus ardens ardens</i>                | <i>Bombus</i>                   | 97              | 22        | N               | 338          | 55              | Y            | 2226          | 77         | Y             |
| No.202                                            | <i>Bombus ardens ardens</i>                | <i>Bombus</i>                   | 410             | 5         | Y               | 943          | 12              | Y            | 1802          | 33         | Y             |
| No.201                                            | <i>Mallotus japonicus</i>                  | <i>Bombus</i> -touched flower   | 465             | 41        | Y               | 1513         | 69              | Y            | 17904         | 117        | Y             |
| No.176                                            | <i>Mallotus japonicus</i>                  | <i>Bombus</i> -touched flower   | 211             | 18        | Y               | 684          | 32              | Y            | 4784          | 56         | Y             |
| No.178                                            | <i>Mallotus japonicus</i>                  | <i>Bombus</i> -touched flower   | 373             | 23        | Y               | 912          | 48              | Y            | 4829          | 80         | Y             |
| No.187                                            | <i>Mallotus japonicus</i>                  | <i>Bombus</i> -touched flower   | 24              | 10        | N               | 81           | 20              | N            | 580           | 44         | N             |
| No.189                                            | <i>Mallotus japonicus</i>                  | <i>Bombus</i> -touched flower   | 122             | 16        | Y               | 409          | 47              | Y            | 3321          | 67         | Y             |
| <b>Honeybees</b>                                  |                                            |                                 |                 |           |                 |              |                 |              |               |            |               |
| No.163                                            | <i>Apis cerana japonica</i>                | <i>Apis</i>                     | 8               | 5         | N               | 32           | 11              | N            | 101           | 21         | N             |
| No.165                                            | <i>Apis cerana japonica</i>                | <i>Apis</i>                     | 335             | 14        | Y               | 1093         | 26              | Y            | 3337          | 45         | Y             |
| No.167                                            | <i>Apis mellifera</i>                      | <i>Apis</i>                     | 8               | 6         | N               | 18           | 12              | N            | 1089          | 29         | Y             |
| No.169                                            | <i>Apis cerana japonica</i>                | <i>Apis</i>                     | 78              | 21        | N               | 248          | 36              | Y            | 2504          | 53         | Y             |
| No.175                                            | <i>Apis cerana japonica</i>                | <i>Apis</i>                     | 38              | 9         | N               | 102          | 21              | N            | 387           | 40         | N             |
| No.184                                            | <i>Apis cerana japonica</i>                | <i>Apis</i>                     | 98              | 10        | N               | 255          | 20              | Y            | 862           | 43         | N             |
| No.186                                            | <i>Apis cerana japonica</i>                | <i>Apis</i>                     | 39              | 14        | N               | 108          | 20              | N            | 319           | 40         | N             |
| No.162                                            | <i>Mallotus japonicus</i>                  | <i>Apis</i> -touched flower     | 28              | 17        | N               | 104          | 35              | N            | 330           | 63         | N             |
| No.164                                            | <i>Mallotus japonicus</i>                  | <i>Apis</i> -touched flower     | 306             | 16        | Y               | 1064         | 31              | Y            | 4440          | 52         | Y             |
| No.166                                            | <i>Mallotus japonicus</i>                  | <i>Apis</i> -touched flower     | 172             | 14        | Y               | 337          | 24              | Y            | 4185          | 47         | Y             |
| No.168                                            | <i>Mallotus japonicus</i>                  | <i>Apis</i> -touched flower     | 294             | 13        | Y               | 799          | 23              | Y            | 5104          | 36         | Y             |
| No.174                                            | <i>Mallotus japonicus</i>                  | <i>Apis</i> -touched flower     | 210             | 18        | Y               | 613          | 40              | Y            | 1851          | 74         | Y             |
| No.183                                            | <i>Mallotus japonicus</i>                  | <i>Apis</i> -touched flower     | 179             | 17        | Y               | 507          | 34              | Y            | 3595          | 61         | Y             |
| No.185                                            | <i>Mallotus japonicus</i>                  | <i>Apis</i> -touched flower     | 384             | 27        | Y               | 1222         | 49              | Y            | 3779          | 79         | Y             |
| Total                                             |                                            |                                 | 13615           | 103       |                 | 33267        | 221             |              | 125984        | 309        |               |
| <b>Used in the main analysis</b>                  |                                            |                                 | <b>13145</b>    | <b>89</b> |                 | <b>32620</b> | <b>207</b>      |              | <b>122464</b> | <b>294</b> |               |

\*"Category" column indicates the group names for the downstream statistical analyses.

Samples highlighted in gray color (indicated by "N") were excluded from the downstream statistical analyses because of the limited number of the high-quality sequence reads.

**Table S2. Unique microbial OTU identified.**

| OTU ID                        | Insect data |               |                 | Flower data          |                      |                        |         | Taxa assigned by Claident |                     |                            |                        |                           |                        |
|-------------------------------|-------------|---------------|-----------------|----------------------|----------------------|------------------------|---------|---------------------------|---------------------|----------------------------|------------------------|---------------------------|------------------------|
|                               | <i>Apis</i> | <i>Bombus</i> | <i>Xylocopa</i> | <i>Apis</i> -touched | <i>Bombus</i> -touch | <i>Xylocopa</i> -touch | Control | Kingdom                   | phylum              | class                      | order                  | family                    | genus                  |
| OTU unique to <i>Xylocopa</i> |             |               |                 |                      |                      |                        |         |                           |                     |                            |                        |                           |                        |
| OTU_3                         | 1.9         | 1.2           | 749.3           | 0.1                  | 0.0                  | 1405.3                 | 0.1     | <i>Bacteria</i>           | <i>Firmicutes</i>   | <i>Bacilli</i>             | <i>Lactobacilla</i>    | <i>Lactobacillaceae</i>   |                        |
| OTU_5                         | 23.9        | 0.0           | 1268.0          | 1.1                  | 0.0                  | 594.7                  | 0.0     | <i>Bacteria</i>           | <i>Firmicutes</i>   | <i>Bacilli</i>             | <i>Lactobacilla</i>    | <i>Lactobacillaceae</i>   |                        |
| OTU_252                       | 0.0         | 0.0           | 12.0            | 0.0                  | 0.0                  | 13.7                   | 0.0     | <i>Bacteria</i>           | <i>Firmicutes</i>   | <i>Bacilli</i>             | <i>Lactobacilla</i>    | <i>Lactobacillaceae</i>   |                        |
| OTU_9                         | 1.1         | 0.0           | 432.0           | 0.4                  | 0.0                  | 228.0                  | 0.0     | <i>Bacteria</i>           |                     |                            |                        |                           |                        |
| OTU_165                       | 0.0         | 0.0           | 19.3            | 0.0                  | 0.0                  | 39.7                   | 0.0     | <i>Bacteria</i>           | <i>Firmicutes</i>   | <i>Bacilli</i>             | <i>Lactobacillales</i> |                           |                        |
| OTU_314                       | 0.0         | 0.0           | 83.3            | 0.0                  | 0.0                  | 29.7                   | 0.0     | <i>Bacteria</i>           | <i>Firmicutes</i>   | <i>Bacilli</i>             | <i>Lactobacillales</i> |                           |                        |
| OTU_30                        | 0.0         | 0.0           | 16.7            | 0.1                  | 0.0                  | 71.3                   | 0.0     | Unknown                   |                     |                            |                        |                           |                        |
| OTU_41                        | 0.0         | 0.0           | 42.7            | 0.1                  | 0.0                  | 47.0                   | 0.0     | <i>Bacteria</i>           | <i>Bacteroidete</i> | <i>Flavobacter</i>         | <i>Flavobacter</i>     | <i>Flavobacteriaceae</i>  |                        |
| OTU_260                       | 0.0         | 0.0           | 15.0            | 0.0                  | 0.0                  | 20.3                   | 0.0     | <i>Bacteria</i>           | <i>Firmicutes</i>   |                            |                        |                           |                        |
| OTU_462                       | 0.1         | 0.0           | 52.0            | 0.0                  | 0.0                  | 14.7                   | 0.0     | <i>Bacteria</i>           | <i>Firmicutes</i>   |                            |                        |                           |                        |
| OTU_152                       | 0.0         | 0.0           | 26.3            | 0.0                  | 0.0                  | 3.3                    | 0.0     | <i>Bacteria</i>           | <i>Firmicutes</i>   | <i>Bacilli</i>             | <i>Lactobacillales</i> |                           |                        |
| OTU_18                        | 0.1         | 0.0           | 108.0           | 0.6                  | 0.0                  | 79.3                   | 0.0     | <i>Bacteria</i>           | <i>Actinobacte</i>  | <i>Actinobacte</i>         | <i>Bifidobacter</i>    | <i>Bifidobacteriaceae</i> |                        |
| OTU_91                        | 0.4         | 0.0           | 12.3            | 0.0                  | 0.0                  | 6.3                    | 0.0     | <i>Bacteria</i>           | <i>Actinobacte</i>  | <i>Actinobacte</i>         | <i>Bifidobacter</i>    | <i>Bifidobacter</i>       | <i>Bifidobacterium</i> |
| OTU unique to <i>Bombus</i>   |             |               |                 |                      |                      |                        |         |                           |                     |                            |                        |                           |                        |
| OTU_11                        | 6.3         | 280.2         | 0.7             | 0.3                  | 7.4                  | 0.3                    | 0.0     | <i>Bacteria</i>           |                     |                            |                        |                           |                        |
| OTU_8                         | 0.6         | 14.4          | 0.0             | 44.6                 | 27.6                 | 0.0                    | 224.3   | <i>Bacteria</i>           | <i>Proteobacte</i>  | <i>Gammaprot</i>           | <i>Pseudomonc</i>      | <i>Pseudomonc</i>         | <i>Pseudomonas</i>     |
| OTU_238                       | 1.1         | 6.6           | 0.0             | 8.7                  | 33.6                 | 0.0                    | 11.6    | <i>Bacteria</i>           | <i>Proteobacte</i>  | <i>Gammaprot</i>           | <i>Pseudomonc</i>      | <i>Pseudomonc</i>         | <i>Pseudomonas</i>     |
| OTU_118                       | 0.0         | 7.2           | 0.0             | 5.1                  | 8.6                  | 1.7                    | 3.7     | <i>Bacteria</i>           | <i>Proteobacte</i>  | <i>Alphaproteo</i>         | <i>Rhizobiales</i>     |                           |                        |
| OTU unique to <i>Apis</i>     |             |               |                 |                      |                      |                        |         |                           |                     |                            |                        |                           |                        |
| OTU_143                       | 9.7         | 0.0           | 0.0             | 0.0                  | 0.0                  | 0.0                    | 0.0     | <i>Bacteria</i>           | <i>Proteobacte</i>  | <i>Betaproteobacteria</i>  |                        |                           |                        |
| OTU_10                        | 7.1         | 1.2           | 0.3             | 0.0                  | 0.0                  | 2.3                    | 0.0     | <i>Bacteria</i>           | <i>Proteobacte</i>  | <i>Gammaproteobacteria</i> |                        |                           |                        |
| OTU_82                        | 4.1         | 0.4           | 0.0             | 1.6                  | 0.6                  | 0.0                    | 0.6     | <i>Bacteria</i>           | <i>Actinobacte</i>  | <i>Actinobacte</i>         | <i>Actinomycet</i>     | <i>Microbacteriaceae</i>  |                        |

Numbers indicate the mean value of sequence count of each category



**a** *Xylocopa appendiculata circumnivolans*

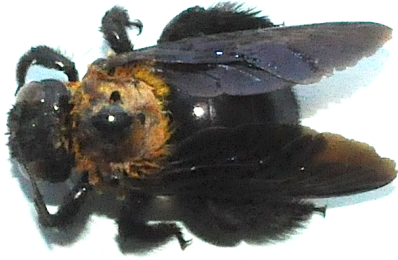

**b** *Bombus ardens ardens*

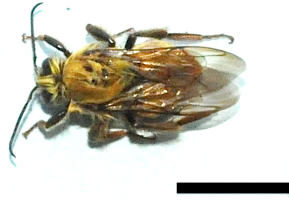

**c** *Apis mellifera*

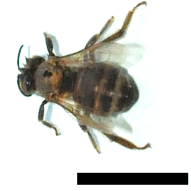

**d** *Phytomia zonata*

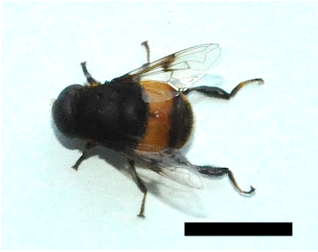

**e** *Oxycetonia jucunda*

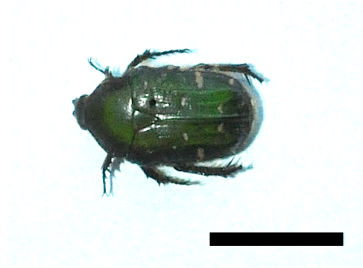

**f** *Tachina nupta*

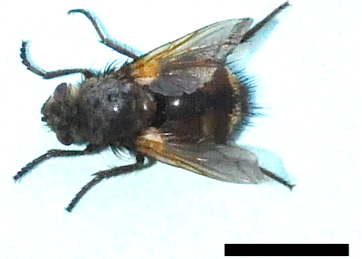

**g** *Vespa analis insularis*

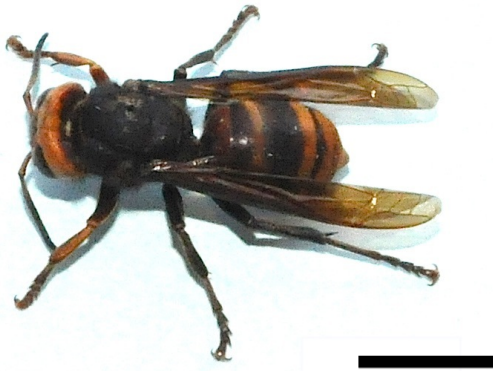

**h** Microbes on *Vespa analis insularis*

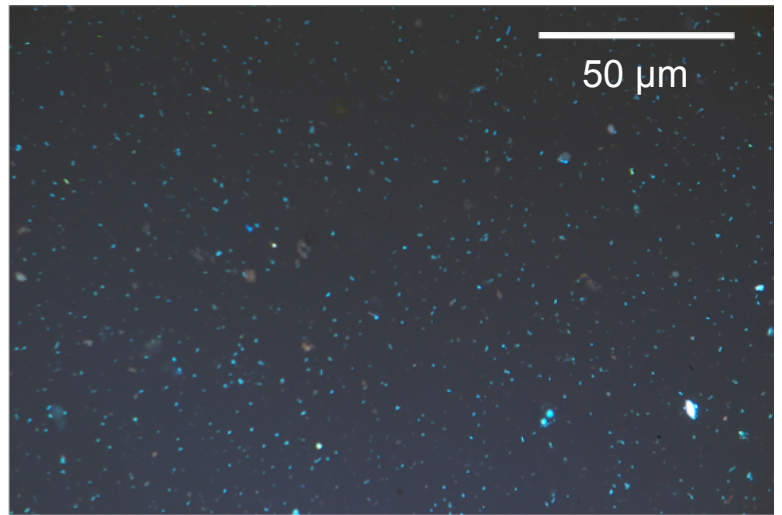

**Figure S1.**

Examples of collected insects (a–g) and a microscopic image of stained microbes on *Vespa analis insularis* (h). Black bars in the insect pictures indicate 1 cm (a–g). Bright blue cells in the microscopic image were microbes stained with DAPI (see Methods). All photos were taken by M. Ushio.



### a Lab experiment

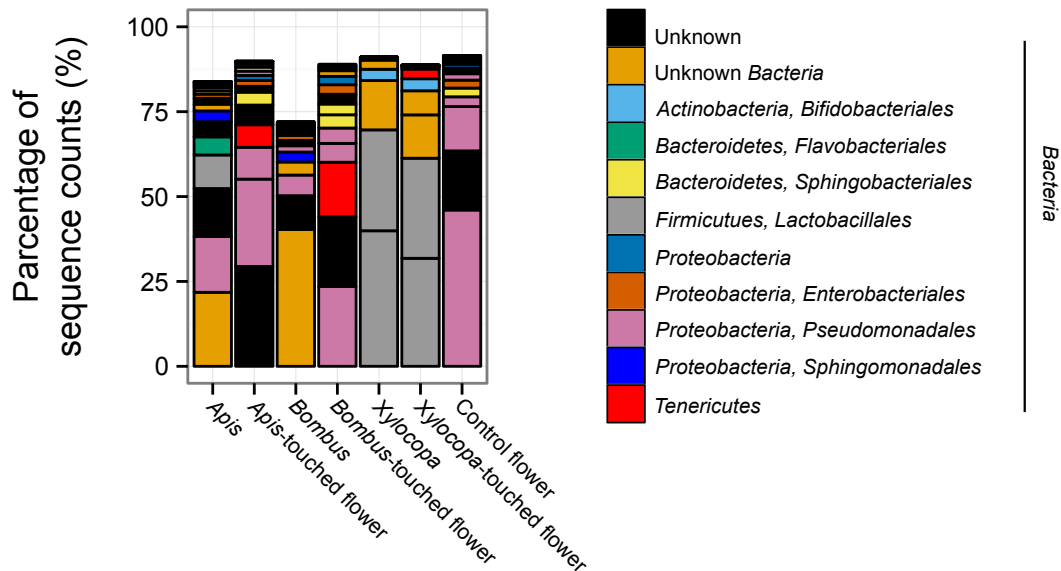

### b Natural pattern (all)

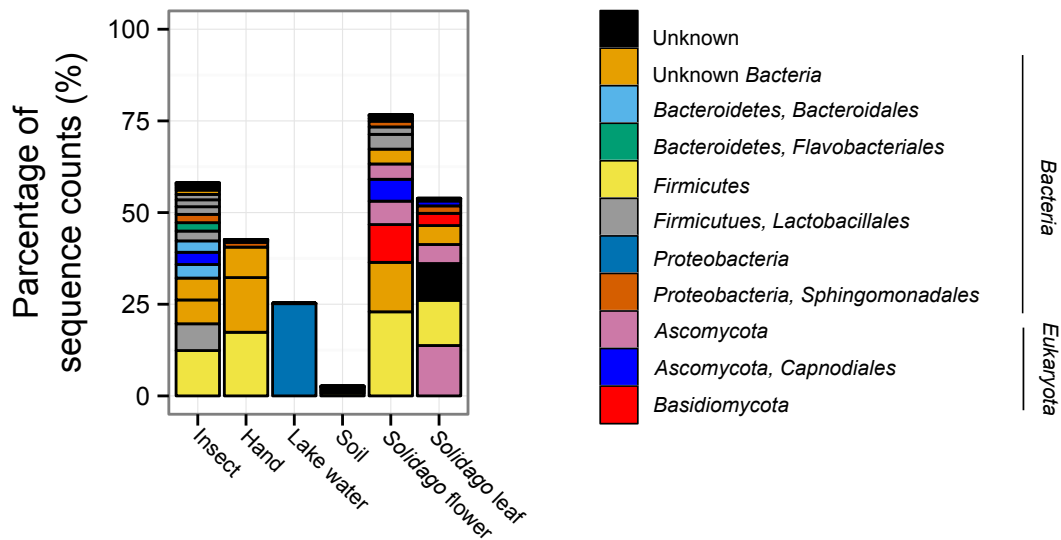

### c Natural pattern (insects and plants)

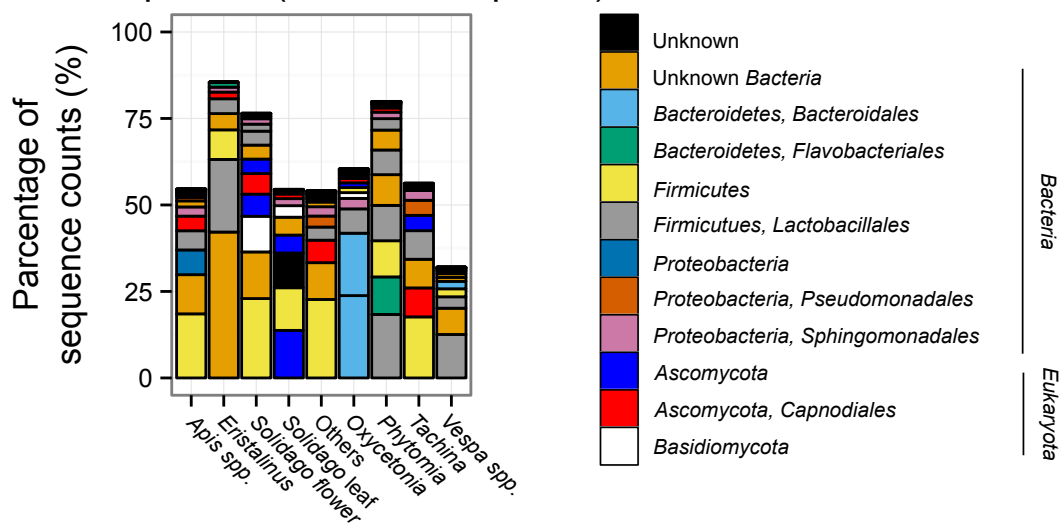

**Figure S2**

Summary of assigned taxonomy for dominant OTUs for (a) lab contacting experiment, (b) natural pattern (all sample included), and (c) natural pattern (only insect and plant samples). Only the 20 most dominant OTUs are shown. Bar colors were assigned based on the OTU's phylum and order. Taxonomy assignment was performed using Claident<sup>2</sup>.

**a** 100-bp global trimming dataest

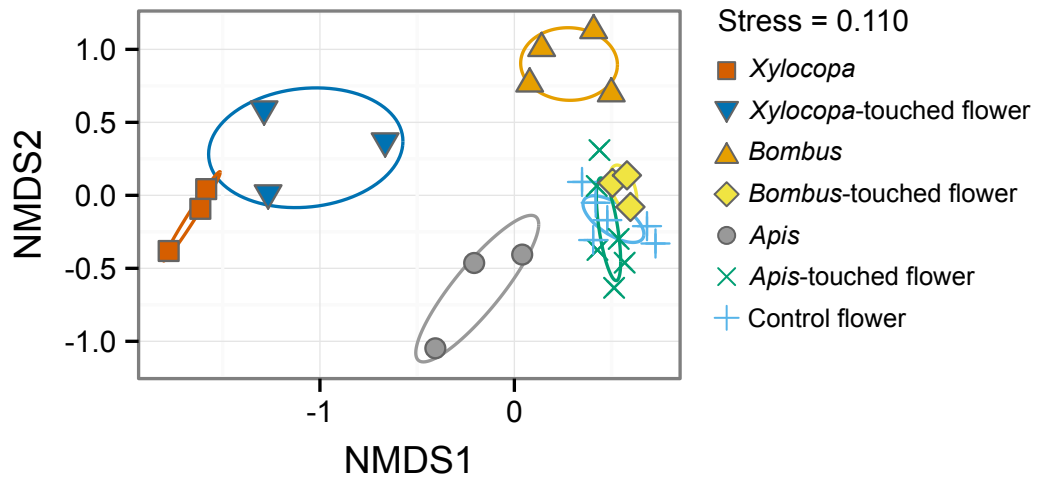

**b** 150-bp global triming dataest

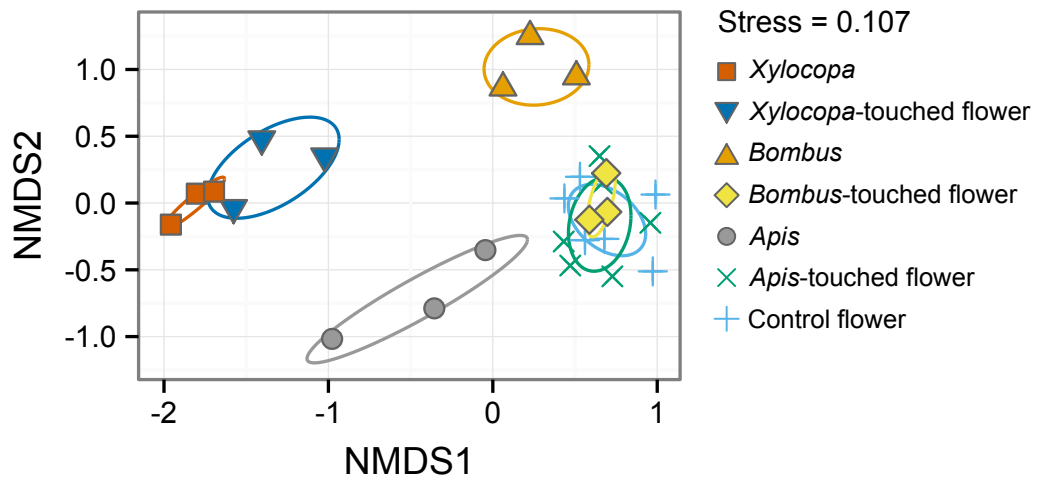

**c** 200-bp global trimming dataest

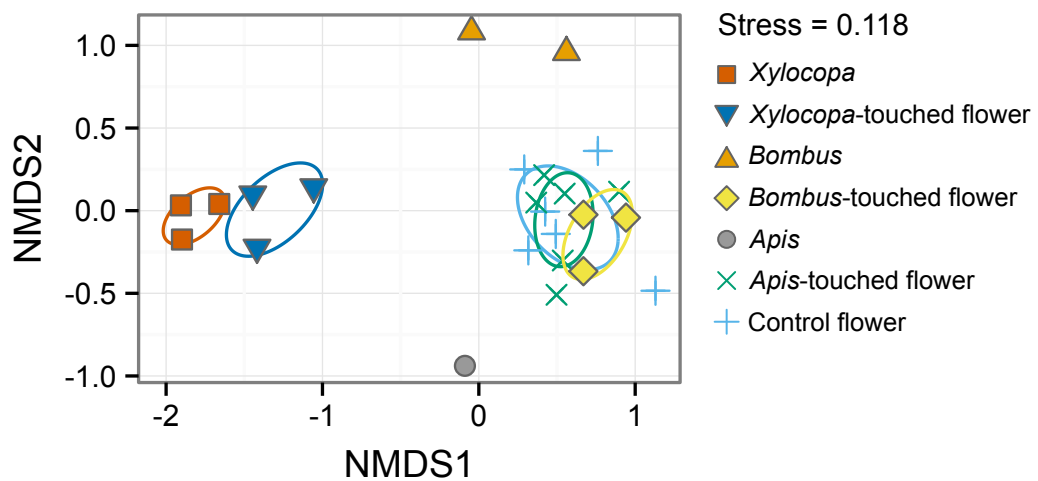

**Figure S3**

Microbial community composition of the insect and flower surfaces in the laboratory contacting experiment, analyzed using sequence datasets with (a)100-bp, (b)150-bp, and (c) 200-bp global trimming. The NMDS plot of the 150-bp dataset is identical to the NMDS plot in the Figure 2 of the main text, but replicated here for direct compariton.

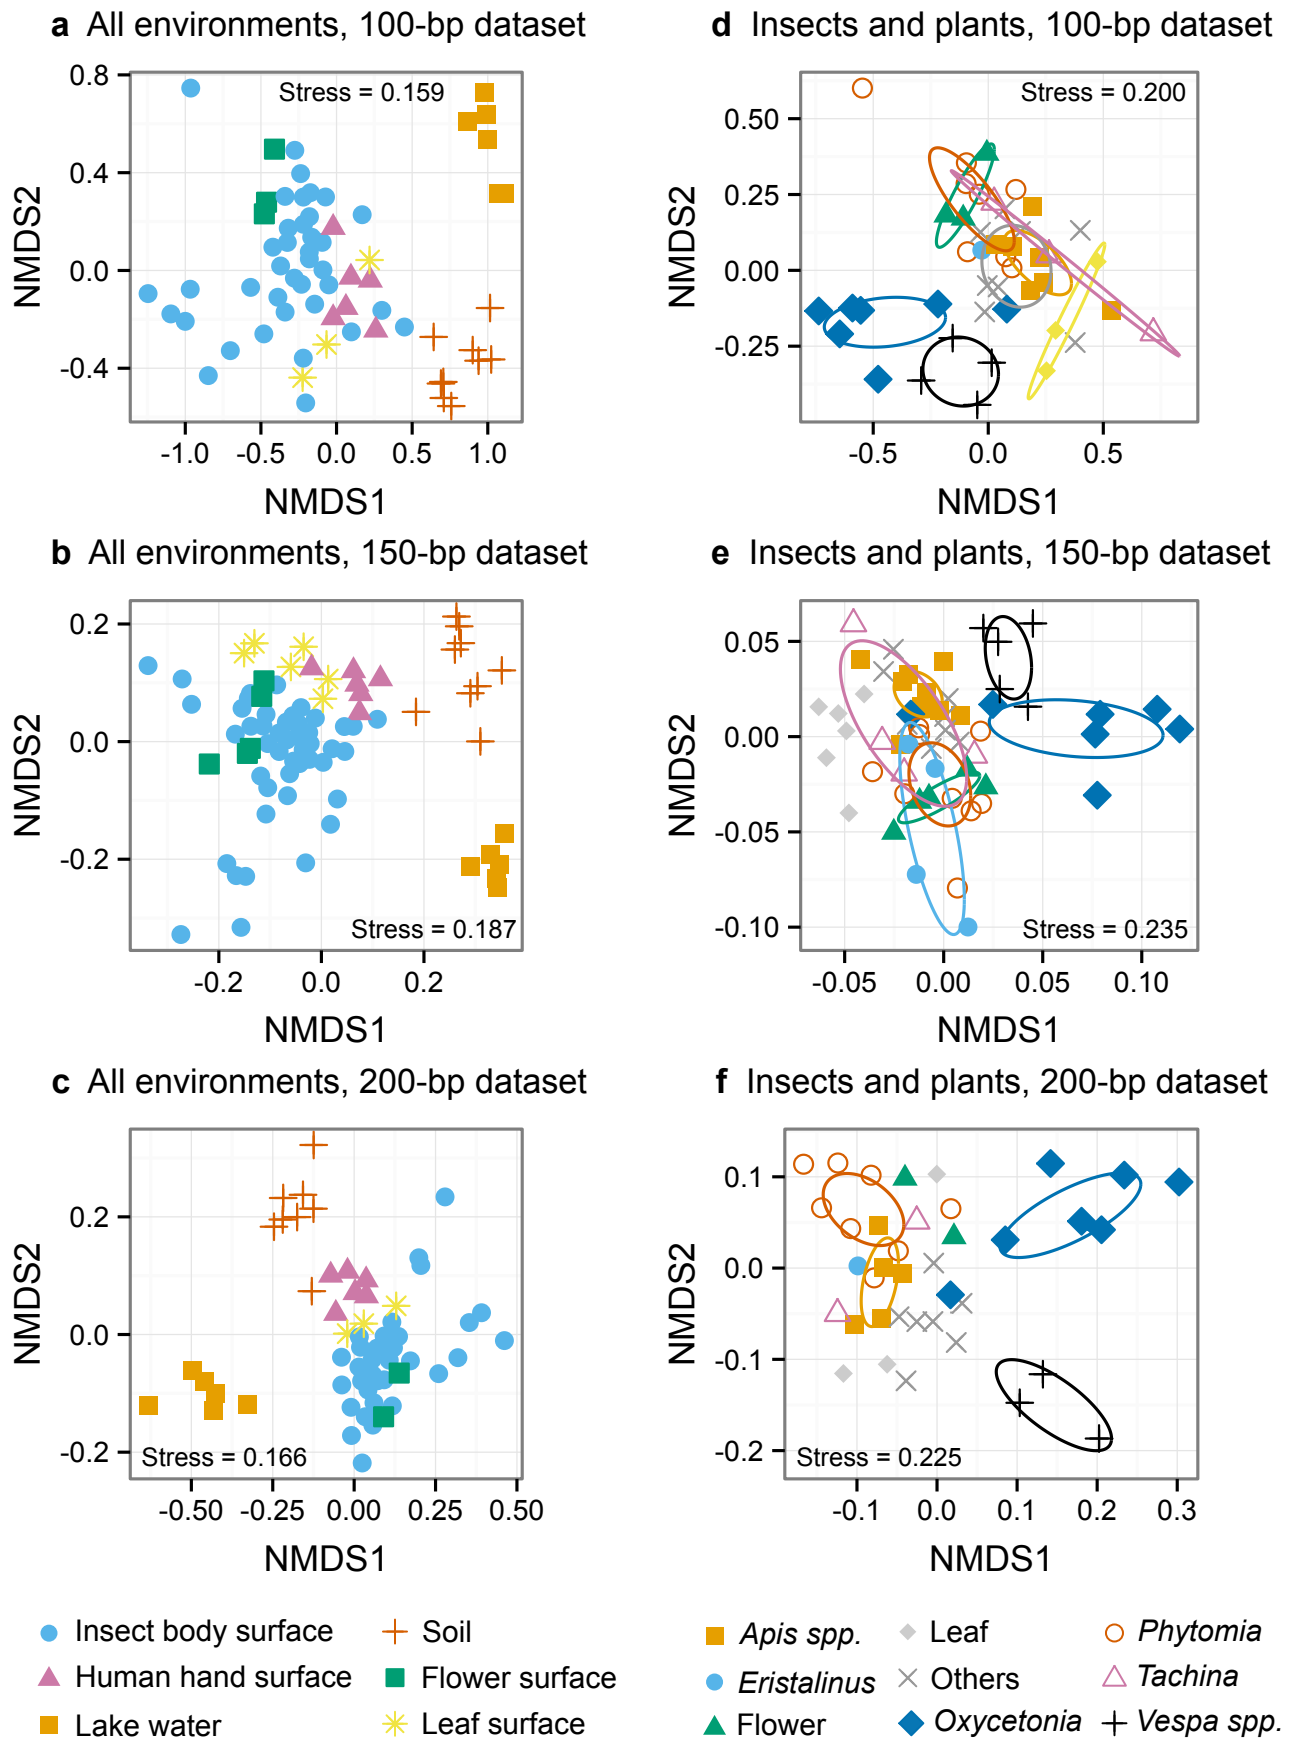

**Figure S4**

NMDS plots for the microbial communities recovered from insect and plant surfaces and other environments, using sequence datasets with (a, d) 100-bp, (b, e) 150-bp, and (c, f) 200-bp global trimming. These figures correspond to Figure 3 in the main text. NMDS plots for the 150-bp dataset are identical to those in Figure 3, but are shown here for direct comparison. Ovals in the figures in the right column (d–f) show 95% confidence intervals.
